# Supplementary material for: Neomorphic PDGFRA extracellular domain driver mutations are resistant to PDGFRA targeted therapies
Source: PubMed Central journal article supplement (PMC6214970; doi:10.1038/s41467-018-06949-w), 2018-11-02
Supplement: 41467_2018_6949_MOESM3_ESM.pdf [file 41467_2018_6949_MOESM3_ESM.pdf]

## **Description of Additional Supplementary Files**

### **File Name: Supplementary Data 1**

**Description:** Computational prediction on features of activating versus non-activating mutations.

### **File Name: Supplementary Data 2**

**Description:** Mutation frequency of PDGFRA in different domains across cancer types in GENIE data set.
